# Supplementary material
Source: HighWire-hosted journal article supplement (https://www.cmajopen.ca/highwire/filestream/88174/field_highwire_adjunct_files/3/open-2021-0321-4-at.pdf)
Supplement: open-2021-0321-4-at.pdf [file open-2021-0321-4-at.pdf]

**Table II: Positive tests for SARS-CoV-2 RNA (number of positive samples/number of patients or cases sampled)**

| Surgical Service (No. of cases)        | Peritoneal fluid <sup>a</sup> | Vaginal fluid <sup>a</sup> | Myometrial swab <sup>a</sup> | Placent a swab <sup>a</sup> (fetal side) | Surgical instruments <sup>a</sup> | ETT <sup>a</sup> | Cautery filter <sup>a</sup> | Air sample from GilAir pump filter <sup>b</sup> | Petri dish UTM (passive air sampling) <sup>a</sup> | Floor swab <sup>b</sup> | Face shield <sup>a</sup> | Masks <sup>b</sup> |
|----------------------------------------|-------------------------------|----------------------------|------------------------------|------------------------------------------|-----------------------------------|------------------|-----------------------------|-------------------------------------------------|----------------------------------------------------|-------------------------|--------------------------|--------------------|
| Obstetrics<br>N=9                      | 1/5                           | 1/7                        | 1/4                          | 1/7                                      | --                                | 1/1              | 0/4                         | 0/5                                             | --                                                 | 0/14                    | 0/1                      | 0/34               |
| Gynecology<br>Oncology<br>N=2          | --                            | NA                         | NA                           | NA                                       | 1/ 1                              | 1/ 2             | 0/2                         | 0/3                                             | --                                                 | 1/4                     | --                       | 0/11               |
| Orthopedics/<br>Trauma<br>N=7          | NA                            | NA                         | NA                           | NA                                       | 0/5                               | 1/ 1             | 0/6                         | 0/11                                            | 0/4                                                | 1/14                    | --                       | 0/31               |
| General<br>Surgery<br>N=2              | 0/1                           | NA                         | NA                           | NA                                       | --                                | 0/1              | 0/2                         | 0/4                                             | --                                                 | 0/4                     | 0/1                      | 0/9                |
| Tracheo-<br>stomy<br>N= 4              | NA                            | NA                         | NA                           | NA                                       | 0/1                               | 3/ 4             | 0/4                         | 0/8                                             | 0/1                                                | 2/8                     | --                       | 0/19               |
| Gastro-<br>enterology<br>N=1           | NA                            | NA                         | NA                           | NA                                       | 1/1                               | --               | NA                          | 0/2                                             | 0/1                                                | 0/2                     | --                       | 0/3                |
| Burn/Plastic<br>Surgery<br>N=3         | NA                            | NA                         | NA                           | NA                                       | 0/2                               | 2/2              | 0/3                         | 0/8                                             | 1/1                                                | 1/8                     | 0/1                      | 0/22               |
| Cardiac/<br>Vascular<br>Surgery<br>N=2 | NA                            | NA                         | NA                           | NA                                       | 0/1                               | 0/1              | 0/2                         | 0/4                                             | --                                                 | 0/4                     | 0/1                      | 0/10               |
| Neuro<br>Surgery<br>N=1                | NA                            | NA                         | NA                           | NA                                       | --                                | --               | 0/1                         | 0/2                                             | --                                                 | 0/2                     | --                       | 0/4                |
|                                        | <b>1/6</b>                    | <b>1/7</b>                 | <b>1/4</b>                   | <b>1/7</b>                               | <b>2/11</b>                       | <b>8/12</b>      | <b>0/24</b>                 | <b>0/47</b>                                     | <b>1/7</b>                                         | <b>5/60</b>             | <b>0/4</b>               | <b>0/143</b>       |

|                           |  |  |  |  |  |  |  |  |  |  |  |  |
|---------------------------|--|--|--|--|--|--|--|--|--|--|--|--|
| <b>Total: 32 patients</b> |  |  |  |  |  |  |  |  |  |  |  |  |
|---------------------------|--|--|--|--|--|--|--|--|--|--|--|--|

Legend:

Abbreviations:

NA, not applicable; -- (empty cell), sample was either: not taken or patient consent was not possible; ETT, endotracheal tube; UTM, universal transport medium

<sup>a</sup> number of positive tests/number of cases sampled

<sup>b</sup> number of positive tests/number of tests performed (e.g. 1-2 tests per surgical/obstetrical case)
